# Supplementary material
Source: ML conference proceedings conference paper supplement (https://openaccess.thecvf.com/content/CVPR2024/html/Li_Towards_Scalable_3D_CVPR_2024_paper.html)
Supplement: Supplementary file 1 [file Li_Towards_Scalable_3D_CVPR_2024_supplemental.pdf]

# *Supplementary Material for* **Towards Scalable 3D Anomaly Detection and Localization: A Benchmark via 3D Anomaly Synthesis and A Self-Supervised Learning Network**

In this supplementary material, we provide more details that could not be included in the main manuscript due to the lack of space. The contents are summarized below:

- **S1.** More Anomaly-ShapeNet anomaly samples.
- **S2.** Visualization samples of Real3D-AD for anomaly detection and localization.
- **S3.** Complete experiment results of IMRNet on anomaly detection and segmentation.
- **S4.** Ablation Study of iteration number and patch size.
- **S5.** Limitations and future works.

## **S1. Anomaly-ShapeNet Samples**

In this section, we present more anomalous examples of our proposed Anomaly-ShapeNet dataset. Figure **S1** and **S2** display the meshes and point clouds legends of six different anomaly types.

## **S2. Visualization samples of Real3D-AD for anomaly detection and localization.**

Within the main text, we showcase a subset of the visualization results for anomaly detection and localization performed by the IMRNet algorithm on Anomaly-ShapeNet. Due to space constraints, the visualizations of IMRNet’s detection results on Real-3D are presented in Figure **S3**. In this figure, the detection and localization performance of our IMRNet algorithm is evidently superior to that of the CPMF and RegAD algorithms.

## **S3. Complete experiment results of IMRNet on anomaly detection and segmentation**

To provide a comprehensive benchmark for our Anomaly-ShapeNet dataset, we tested different metrics on the Anomaly-ShapeNet dataset using mainstream 3D algorithms. The experimental results are presented in Table **S1** and Table **S2**

## **S4. Ablation study of iteration number and patch size.**

In the main text, we present the experimental results demonstrating the correlation between the effectiveness of IMRNet’s anomaly detection and the masking rate. As a supplement, we provide the relationship curves between anomaly detection performance, mask size, and iteration number in Figure **S4** to aid in understanding the relation of experimental parameters and the detection effect. Figure **S4** demonstrate the best iteration time and patch size are 3 and 64. Theoretically, larger iteration time and patch size may induce normal point drift and increase the positive false rate, while smaller ones may be not enough to cover all anomaly regions.

## **S5. Limitations and future works.**

Our proposed Anomaly-ShapeNet dataset, while encompassing a broad distribution of samples, still lacks sufficient scale. Future work will need to focus on expanding the number of samples within the dataset. Moreover, Pure point cloud coordinate-based 3D anomaly detection does not fully conform to real-world 3D anomaly detection scenarios. Subsequent efforts should involve the integration of RGB values into our anomaly detection model.

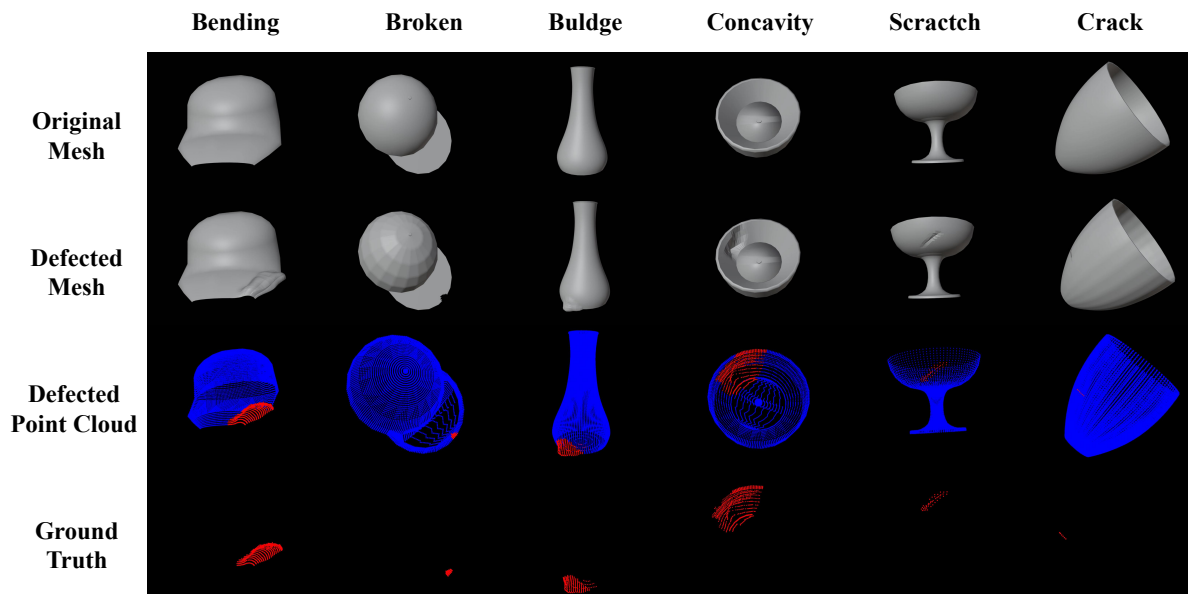

Figure S1. Examples of the proposed Anomaly-ShapeNet

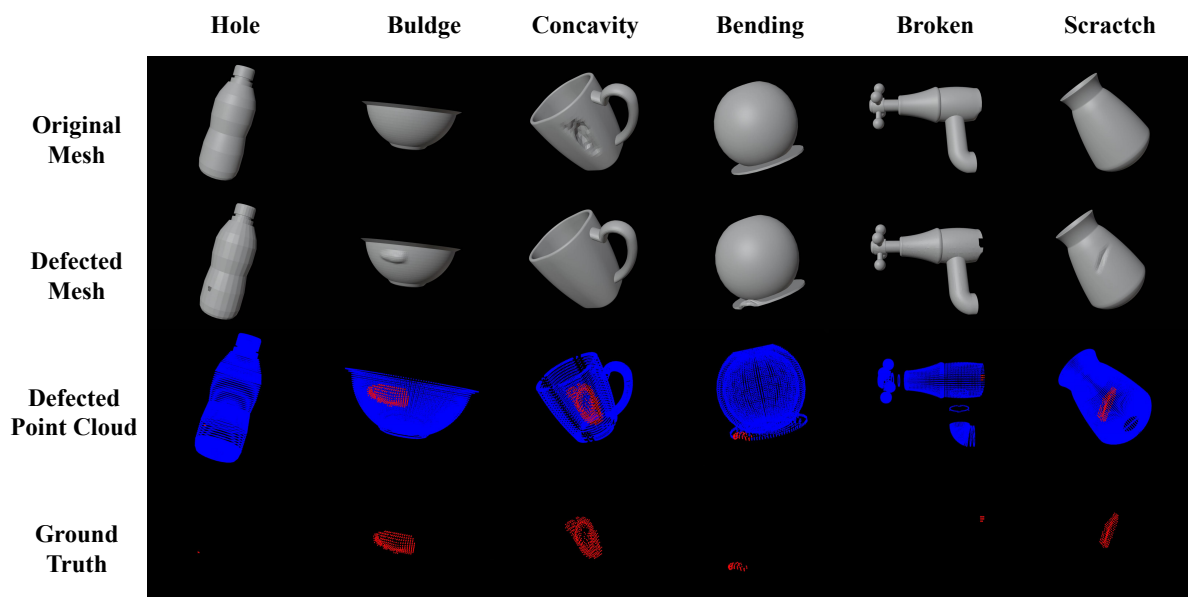

Figure S2. Examples of the proposed Anomaly-ShapeNet.

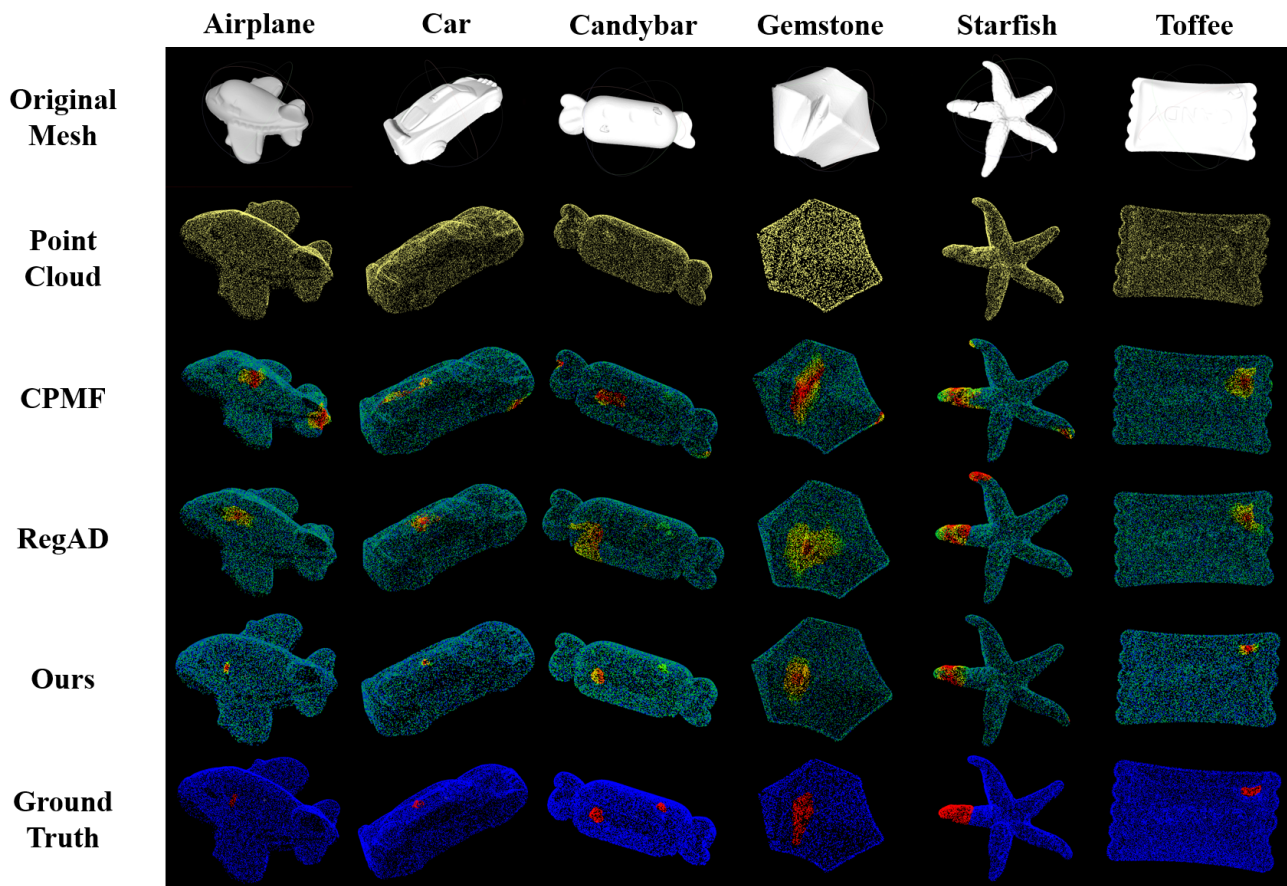

Figure S3. Qualitative results visualization of anomaly localization performance on Real3D-AD.

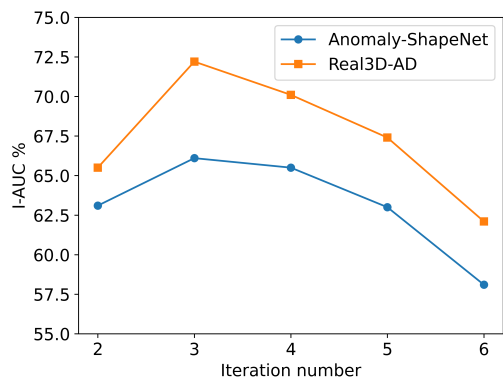

(a) Iteration number influence.

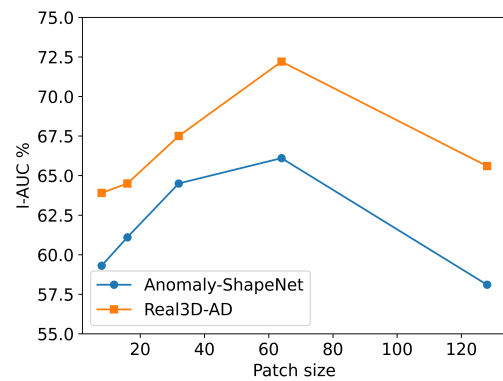

(b) Patch size influence.

Figure S4. Ablation study of iteration number and patch size.

| Method              | cap0  | cap3  | helmet3 | cup0  | bow14 | vase3 | headset1 | eraser0 | vase8 | cap4  | vase2 | vase4 | helmet0 | bucket1 |
|---------------------|-------|-------|---------|-------|-------|-------|----------|---------|-------|-------|-------|-------|---------|---------|
| BTF(Raw)            | 0.524 | 0.687 | 0.700   | 0.632 | 0.563 | 0.602 | 0.475    | 0.637   | 0.550 | 0.469 | 0.403 | 0.613 | 0.504   | 0.686   |
| BTF(FPFH)           | 0.730 | 0.658 | 0.724   | 0.790 | 0.679 | 0.699 | 0.591    | 0.719   | 0.662 | 0.524 | 0.646 | 0.710 | 0.575   | 0.633   |
| M3DM                | 0.531 | 0.605 | 0.655   | 0.715 | 0.624 | 0.658 | 0.585    | 0.710   | 0.551 | 0.718 | 0.737 | 0.655 | 0.599   | 0.699   |
| Patchcore(FPFH)     | 0.472 | 0.653 | 0.737   | 0.655 | 0.720 | 0.430 | 0.464    | 0.810   | 0.575 | 0.595 | 0.721 | 0.505 | 0.548   | 0.571   |
| Patchcore(PointMAE) | 0.544 | 0.488 | 0.615   | 0.510 | 0.501 | 0.465 | 0.423    | 0.378   | 0.364 | 0.725 | 0.742 | 0.523 | 0.580   | 0.574   |
| CPMF                | 0.601 | 0.551 | 0.520   | 0.497 | 0.683 | 0.582 | 0.458    | 0.689   | 0.529 | 0.553 | 0.582 | 0.514 | 0.555   | 0.601   |
| RegAD               | 0.632 | 0.718 | 0.620   | 0.685 | 0.800 | 0.511 | 0.626    | 0.755   | 0.811 | 0.815 | 0.405 | 0.755 | 0.600   | 0.752   |
| <b>Ours</b>         | 0.715 | 0.706 | 0.663   | 0.643 | 0.576 | 0.401 | 0.476    | 0.548   | 0.635 | 0.753 | 0.614 | 0.524 | 0.598   | 0.774   |

  

| Method              | bottle3 | vase0 | bottle0 | tap1  | bow10 | bucket0 | vase5 | vase1 | vase9 | ashtray0 | bottle1 | tap0  | phone | cup1  |
|---------------------|---------|-------|---------|-------|-------|---------|-------|-------|-------|----------|---------|-------|-------|-------|
| BTF(Raw)            | 0.720   | 0.618 | 0.551   | 0.564 | 0.524 | 0.617   | 0.585 | 0.549 | 0.564 | 0.512    | 0.491   | 0.527 | 0.583 | 0.561 |
| BTF(FPFH)           | 0.622   | 0.642 | 0.641   | 0.596 | 0.710 | 0.401   | 0.429 | 0.619 | 0.568 | 0.624    | 0.549   | 0.568 | 0.675 | 0.619 |
| M3DM                | 0.532   | 0.608 | 0.663   | 0.712 | 0.658 | 0.698   | 0.642 | 0.602 | 0.663 | 0.577    | 0.637   | 0.654 | 0.358 | 0.556 |
| Patchcore(FPFH)     | 0.512   | 0.655 | 0.654   | 0.768 | 0.524 | 0.459   | 0.447 | 0.453 | 0.663 | 0.597    | 0.687   | 0.733 | 0.488 | 0.596 |
| Patchcore(PointMAE) | 0.653   | 0.677 | 0.553   | 0.541 | 0.527 | 0.586   | 0.572 | 0.551 | 0.423 | 0.495    | 0.606   | 0.858 | 0.886 | 0.856 |
| CPMF                | 0.435   | 0.458 | 0.521   | 0.657 | 0.745 | 0.486   | 0.651 | 0.486 | 0.545 | 0.615    | 0.571   | 0.458 | 0.545 | 0.509 |
| RegAD               | 0.525   | 0.548 | 0.886   | 0.741 | 0.775 | 0.619   | 0.624 | 0.602 | 0.694 | 0.698    | 0.696   | 0.589 | 0.599 | 0.698 |
| <b>Ours</b>         | 0.641   | 0.535 | 0.556   | 0.699 | 0.781 | 0.585   | 0.682 | 0.685 | 0.691 | 0.671    | 0.702   | 0.681 | 0.742 | 0.688 |

  

| Method              | vase7 | helmet2 | cap5  | shelf0 | bow15 | bow13 | helmet1 | bow11 | headset0 | bag0  | bow12 | jar   | Mean  |
|---------------------|-------|---------|-------|--------|-------|-------|---------|-------|----------|-------|-------|-------|-------|
| BTF(Raw)            | 0.578 | 0.605   | 0.373 | 0.464  | 0.517 | 0.685 | 0.449   | 0.464 | 0.578    | 0.430 | 0.426 | 0.423 | 0.550 |
| BTF(FPFH)           | 0.540 | 0.643   | 0.586 | 0.619  | 0.699 | 0.590 | 0.749   | 0.768 | 0.620    | 0.746 | 0.518 | 0.427 | 0.628 |
| M3DM                | 0.517 | 0.623   | 0.655 | 0.554  | 0.489 | 0.657 | 0.427   | 0.663 | 0.581    | 0.637 | 0.694 | 0.541 | 0.616 |
| Patchcore(FPFH)     | 0.693 | 0.455   | 0.795 | 0.613  | 0.358 | 0.327 | 0.489   | 0.531 | 0.583    | 0.574 | 0.625 | 0.478 | 0.580 |
| Patchcore(PointMAE) | 0.651 | 0.651   | 0.545 | 0.543  | 0.562 | 0.581 | 0.562   | 0.524 | 0.575    | 0.674 | 0.515 | 0.487 | 0.577 |
| CPMF                | 0.504 | 0.515   | 0.551 | 0.783  | 0.684 | 0.641 | 0.542   | 0.488 | 0.699    | 0.655 | 0.635 | 0.611 | 0.573 |
| RegAD               | 0.881 | 0.825   | 0.467 | 0.688  | 0.691 | 0.654 | 0.624   | 0.615 | 0.580    | 0.715 | 0.593 | 0.599 | 0.668 |
| <b>Ours</b>         | 0.593 | 0.644   | 0.742 | 0.605  | 0.715 | 0.599 | 0.604   | 0.705 | 0.705    | 0.668 | 0.684 | 0.765 | 0.650 |

Table S1. P-AUROC score for anomaly detection of 40 categories of our Anomaly-ShapeNet dataset

| Method              | cap0  | cap3  | helmet3 | cup0  | bow14 | vase3 | headset1 | eraser0 | vase8 | cap4  | vase2 | vase4 | helmet0 | bucket1 |
|---------------------|-------|-------|---------|-------|-------|-------|----------|---------|-------|-------|-------|-------|---------|---------|
| BTF(Raw)            | 0.659 | 0.612 | 0.526   | 0.601 | 0.601 | 0.717 | 0.515    | 0.425   | 0.416 | 0.515 | 0.413 | 0.428 | 0.559   | 0.620   |
| BTF(FPFH)           | 0.618 | 0.579 | 0.564   | 0.585 | 0.632 | 0.652 | 0.523    | 0.719   | 0.624 | 0.545 | 0.569 | 0.587 | 0.568   | 0.648   |
| M3DM                | 0.564 | 0.652 | 0.458   | 0.570 | 0.571 | 0.551 | 0.623    | 0.625   | 0.463 | 0.477 | 0.615 | 0.526 | 0.528   | 0.507   |
| Patchcore(FPFH)     | 0.585 | 0.457 | 0.494   | 0.604 | 0.575 | 0.481 | 0.601    | 0.584   | 0.515 | 0.655 | 0.801 | 0.777 | 0.525   | 0.565   |
| Patchcore(PointMAE) | 0.561 | 0.583 | 0.611   | 0.642 | 0.601 | 0.455 | 0.423    | 0.801   | 0.655 | 0.721 | 0.711 | 0.586 | 0.633   | 0.642   |
| CPMF                | 0.601 | 0.541 | 0.645   | 0.647 | 0.683 | 0.588 | 0.619    | 0.544   | 0.673 | 0.645 | 0.632 | 0.655 | 0.333   | 0.501   |
| RegAD               | 0.693 | 0.711 | 0.468   | 0.531 | 0.624 | 0.651 | 0.617    | 0.424   | 0.629 | 0.623 | 0.641 | 0.505 | 0.600   | 0.714   |
| <b>Ours</b>         | 0.711 | 0.702 | 0.575   | 0.455 | 0.630 | 0.708 | 0.656    | 0.599   | 0.639 | 0.658 | 0.655 | 0.528 | 0.697   | 0.732   |

  

| Method              | bottle3 | vase0 | bottle0 | tap1  | bow10 | bucket0 | vase5 | vase1 | vase9 | ashtray0 | bottle1 | tap0  | phone | cup1  |
|---------------------|---------|-------|---------|-------|-------|---------|-------|-------|-------|----------|---------|-------|-------|-------|
| BTF(Raw)            | 0.543   | 0.562 | 0.466   | 0.594 | 0.588 | 0.652   | 0.615 | 0.441 | 0.482 | 0.578    | 0.573   | 0.535 | 0.613 | 0.701 |
| BTF(FPFH)           | 0.602   | 0.641 | 0.644   | 0.575 | 0.576 | 0.483   | 0.472 | 0.655 | 0.638 | 0.651    | 0.625   | 0.610 | 0.662 | 0.651 |
| M3DM                | 0.451   | 0.788 | 0.763   | 0.638 | 0.525 | 0.609   | 0.633 | 0.652 | 0.651 | 0.632    | 0.674   | 0.722 | 0.464 | 0.752 |
| Patchcore(FPFH)     | 0.579   | 0.645 | 0.615   | 0.684 | 0.548 | 0.604   | 0.515 | 0.623 | 0.660 | 0.445    | 0.677   | 0.712 | 0.332 | 0.586 |
| Patchcore(PointMAE) | 0.651   | 0.548 | 0.545   | 0.542 | 0.562 | 0.541   | 0.585 | 0.572 | 0.634 | 0.679    | 0.645   | 0.712 | 0.652 | 0.710 |
| CPMF                | 0.505   | 0.632 | 0.588   | 0.697 | 0.775 | 0.662   | 0.518 | 0.645 | 0.618 | 0.453    | 0.592   | 0.639 | 0.655 | 0.609 |
| RegAD               | 0.474   | 0.615 | 0.632   | 0.599 | 0.494 | 0.632   | 0.588 | 0.468 | 0.574 | 0.588    | 0.695   | 0.676 | 0.614 | 0.638 |
| <b>Ours</b>         | 0.648   | 0.573 | 0.558   | 0.796 | 0.481 | 0.578   | 0.654 | 0.725 | 0.462 | 0.612    | 0.702   | 0.401 | 0.552 | 0.627 |

  

| Method              | vase7 | helmet2 | cap5  | shelf0 | bow15 | bow13 | helmet1 | bow11 | headset0 | bag0  | bow12 | jar   | Mean  |
|---------------------|-------|---------|-------|--------|-------|-------|---------|-------|----------|-------|-------|-------|-------|
| BTF(Raw)            | 0.547 | 0.615   | 0.653 | 0.624  | 0.615 | 0.654 | 0.388   | 0.464 | 0.379    | 0.458 | 0.576 | 0.428 | 0.549 |
| BTF(FPFH)           | 0.592 | 0.588   | 0.593 | 0.611  | 0.699 | 0.499 | 0.721   | 0.648 | 0.531    | 0.551 | 0.515 | 0.479 | 0.598 |
| M3DM                | 0.648 | 0.636   | 0.642 | 0.665  | 0.601 | 0.635 | 0.627   | 0.515 | 0.632    | 0.642 | 0.630 | 0.555 | 0.603 |
| Patchcore(FPFH)     | 0.621 | 0.475   | 0.725 | 0.504  | 0.541 | 0.620 | 0.630   | 0.545 | 0.701    | 0.608 | 0.611 | 0.499 | 0.588 |
| Patchcore(PointMAE) | 0.652 | 0.496   | 0.542 | 0.543  | 0.585 | 0.556 | 0.571   | 0.611 | 0.515    | 0.601 | 0.456 | 0.463 | 0.595 |
| CPMF                | 0.432 | 0.477   | 0.697 | 0.681  | 0.685 | 0.418 | 0.501   | 0.621 | 0.602    | 0.655 | 0.601 | 0.618 | 0.597 |
| RegAD               | 0.455 | 0.618   | 0.77  | 0.675  | 0.555 | 0.441 | 0.381   | 0.515 | 0.538    | 0.608 | 0.495 | 0.601 | 0.584 |
| <b>Ours</b>         | 0.601 | 0.602   | 0.502 | 0.625  | 0.652 | 0.614 | 0.615   | 0.504 | 0.701    | 0.665 | 0.681 | 0.760 | 0.621 |

Table S2. I-AP score for anomaly detection of 40 categories of our Anomaly-ShapeNet dataset
